# Supplementary material for: Biomimetic alkane hydroxylation by cobalt(iii) porphyrin complex and m-chloroperbenzoic acid
Source: Royal Society of Chemistry journal article supplement (doi:10.1039/b103986p), 2001-01-01
Supplement: b103986p.doc [file b103986p.doc]

**Fig. S1** Plot of the trunover numbers *vs*. equiv of *m*-CPBA added in the hydroxylation of *cis*-1,2-dimethylcyclohexane by **1** and *m*-CPBA. See footnote ¶ for the detailed reaction conditions.
